# Supplementary material for: Ionic memory or electrode artefacts? A systematic assessment of nanofluidic memristors
Source: Royal Society of Chemistry journal article supplement (doi:10.1039/d5fd00135h), 2026-01-01
Supplement: d5fd00135h1.pdf [file d5fd00135h1.pdf]

## Supporting Materials

### **Ionic memory or electrode artefacts? A systematic assessment of nanofluidic memristors**

Siddhi Vinayak Pandey<sup>1,3</sup>, Kalluvadi Veetil Saurav,<sup>2,3</sup> Solleti Goutham<sup>1,3</sup>, Anshu Sharma<sup>1,4</sup>,  
Ashok Keerthi<sup>2,3</sup>, Boya Radha <sup>1,3\*</sup>

<sup>1</sup>Department of Physics and Astronomy, School of Natural Sciences, The University of Manchester, Manchester M13 9PL, United Kingdom

<sup>2</sup>Department of Chemistry, School of Natural Sciences, The University of Manchester, Manchester M13 9PL, United Kingdom

<sup>3</sup>National Graphene Institute & Photon Science Institute, The University of Manchester, Manchester M13 9PL, United Kingdom

<sup>4</sup>Department of Applied Sciences and Humanities, Central University of Haryana, Mahendragarh 123029, Haryana, India

\*Correspondence to be addressed to: Radha Boya (email: [radha.boya@manchester.ac.uk](mailto:radha.boya@manchester.ac.uk))

## Supporting Materials

### Contents

|                                                                  |          |
|------------------------------------------------------------------|----------|
| 1. Microhole IV characteristics and optical image                | .....(3) |
| 2. Fabrication schematic and optical images of 2D-nanochannel    | .....(4) |
| 3. I-V's at various salt type, concentration, and frequency      | .....(5) |
| 4. SEM and EDX image of silver rod                               | .....(6) |
| 5. Digital photo of the electrode (before and after cycling)     | .....(8) |
| 6. SEM and EDX image of electrode after cycling with nanochannel | .....(9) |

## Supporting Materials

### 1. Microhole:

We measured ionic currents through a microhole in 1M-KCl solution using Ag/AgCl electrodes, and observed a linear response, without any hysteresis/pinching.

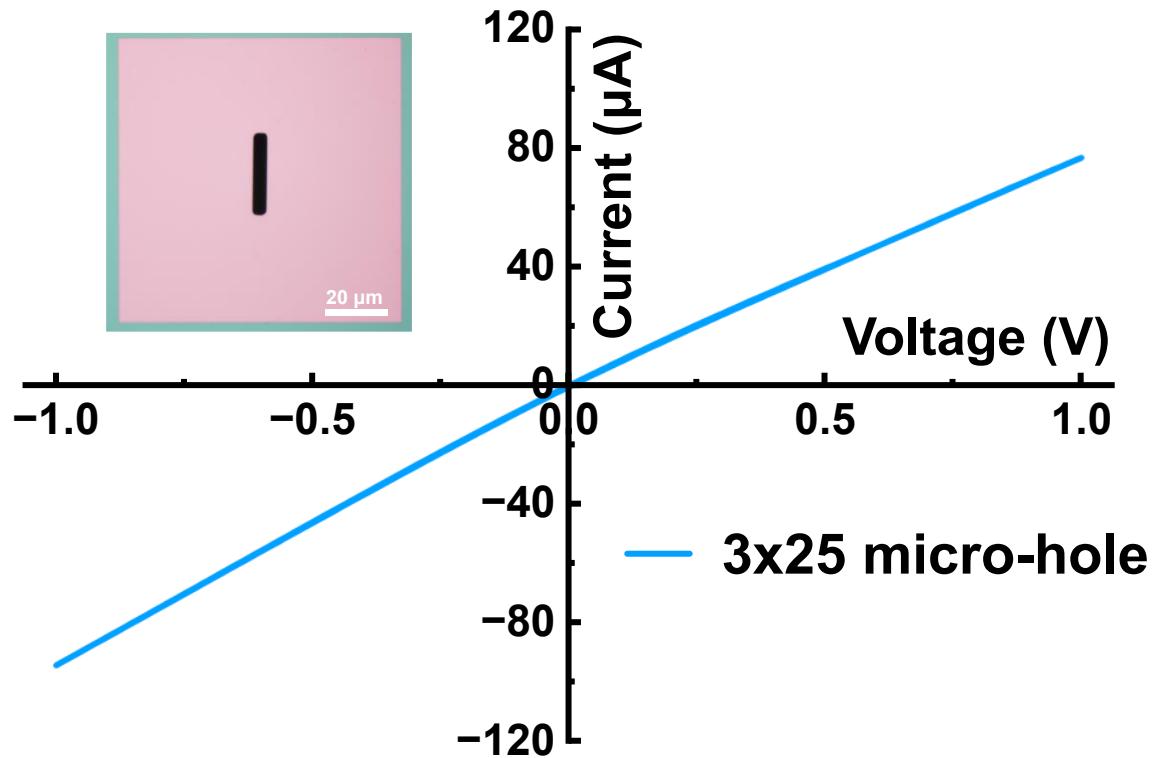

**Supplementary Figure 1.** I-V characteristics of a 3x25 μm Hole measured using a two-electrode Ag/AgCl configuration within a  $\pm 1$  V potential window in 1 M KCl at a sweep frequency of 3.75 mHz. The inset shows the optical image of the microhole.

## 2. 2D Nanochannel:

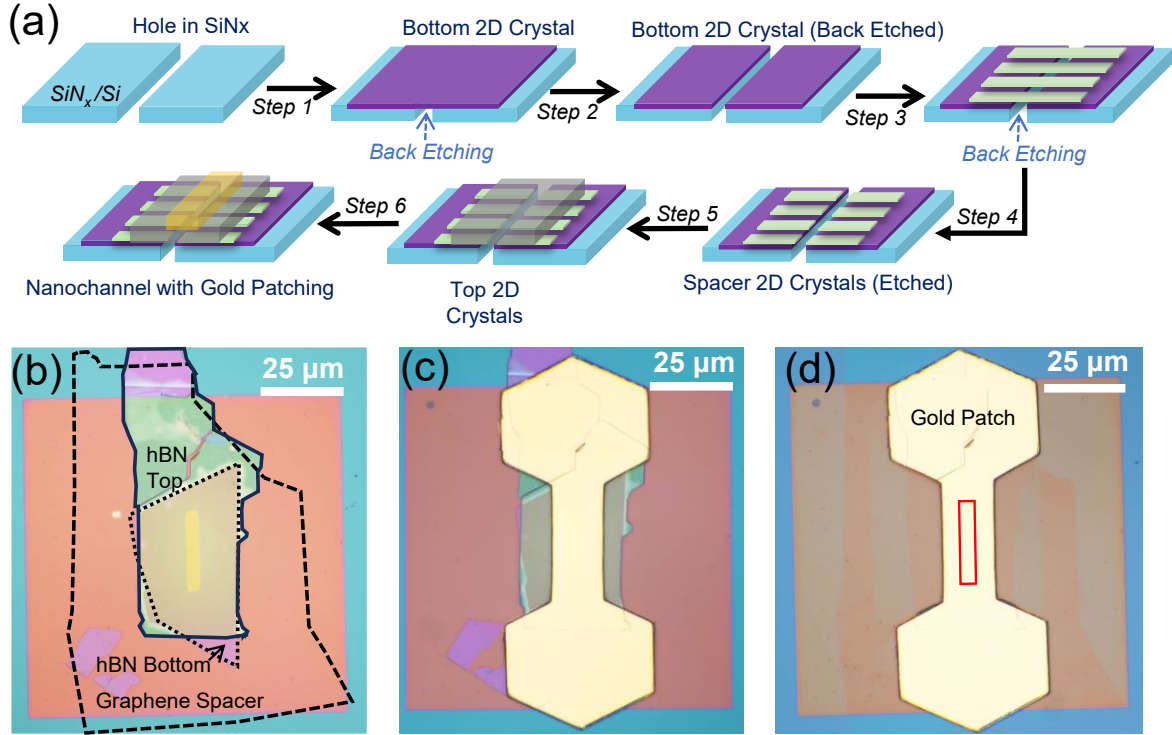

**Supplementary Figure 2.** Fabrication schematic and optical images of 2D nanochannel device. (a) Schematic process flow of device fabrication. A micro-hole is first defined in a freestanding SiN<sub>x</sub>/Si membrane by photolithography and reactive-ion etching. Mechanically exfoliated hBN flakes are then used as bottom and top encapsulation layers, with few-layer graphene in between as the spacer. The graphene is patterned by electron-beam lithography and oxygen plasma etching to define ~130 nm-wide channels, and the hBN/Gr/hBN van der Waals heterostructure is assembled. The stacked heterostructure is annealed in 10% H<sub>2</sub>/Ar to remove residues and improve interlayer adhesion, after which a Cr/Au patch is patterned and deposited to define the nanochannel length and protect the covered region during subsequent etching of the exposed trilayer. Optical images: (b) of tri-layer stack (hBN-Gr-hBN) on SiN<sub>x</sub> free-standing membrane, (c) tri layer stack on SiN<sub>x</sub> after Cr/Au deposition, and (d) final nanochannel device after etching exposed region of the trilayer stack. The red color in (d) contours the microhole.

### 3. Variation of salt type, concentration, and frequency:

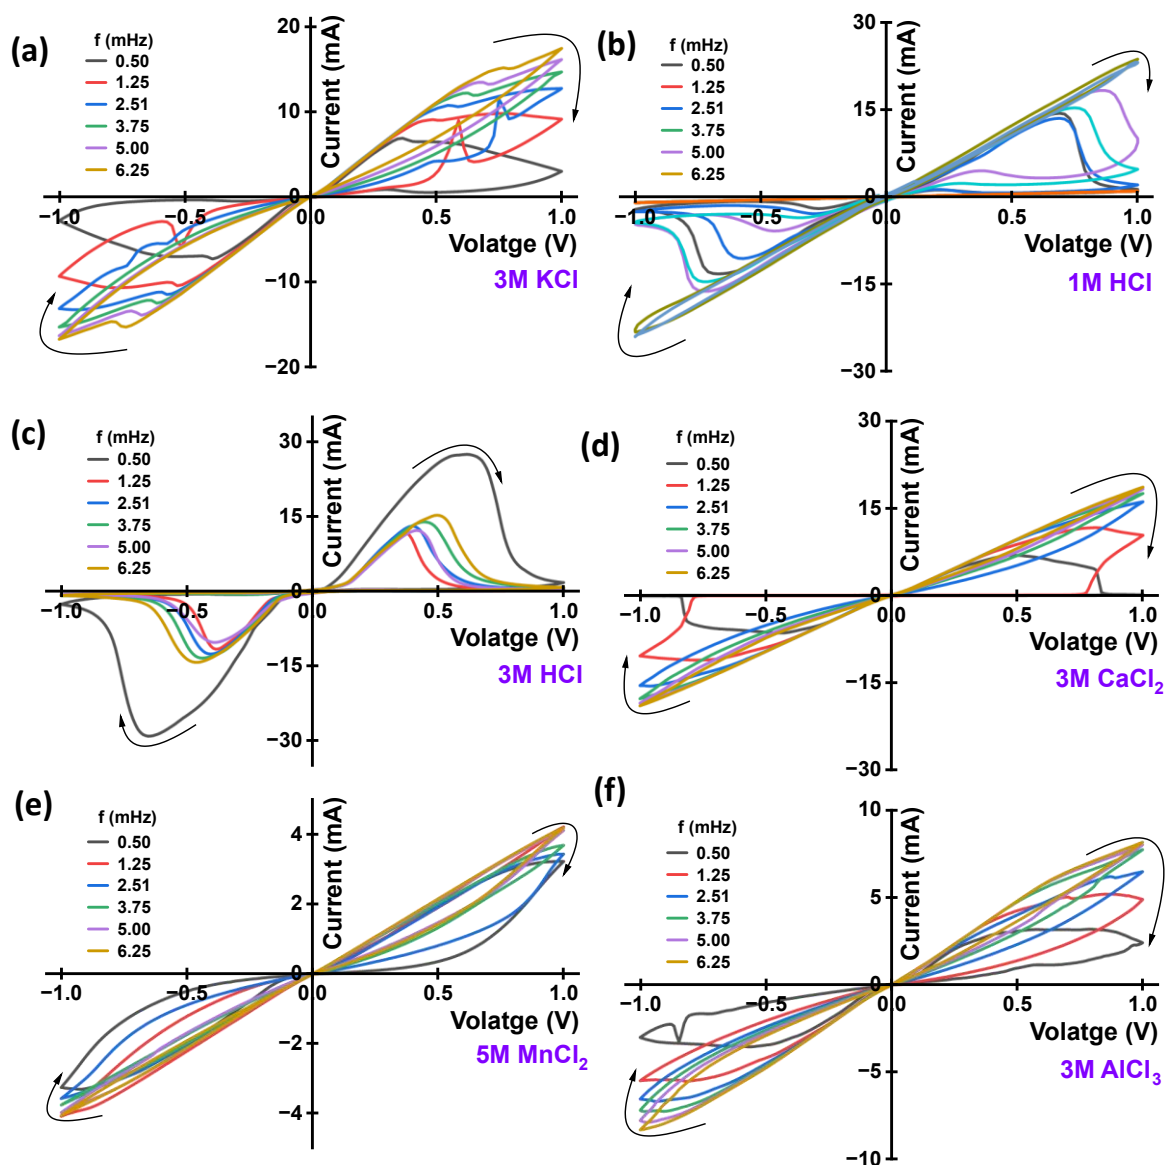

**Supplementary Figure 3.** I-V characteristics of a 100 nm PVDF membrane measured with Ag/AgCl electrodes in different electrolytes and concentrations. Monovalent salts and acid: (a) 3 M KCl, (b) 1 M HCl, (c) 3 M HCl; bivalent salts: (d) 3 M CaCl<sub>2</sub>, (e) 5 M MnCl<sub>2</sub>; trivalent salt: (f) 3 M AlCl<sub>3</sub>. For each electrolyte, the frequency was varied from 0.50 mHz to 6.25 mHz. We observe pinched I-V loops in all of the above salts, and the hysteresis varies significantly with frequency. This demonstrates the strong dependency of the electrochemical response on the applied voltage frequency.

## Supporting Materials

### 4. SEM and EDX image of Silver (Ag) Rod:

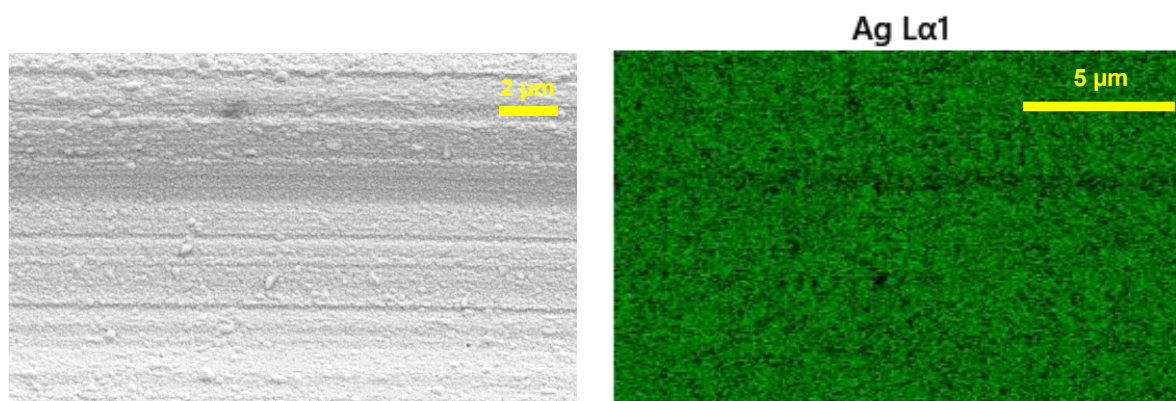

**Supplementary Figure 4.** Image of Silver (Ag) rod (a) SEM, (b) EDX.

## Supporting Materials

### 5. Photographs of the electrode before and after 250 cycles:

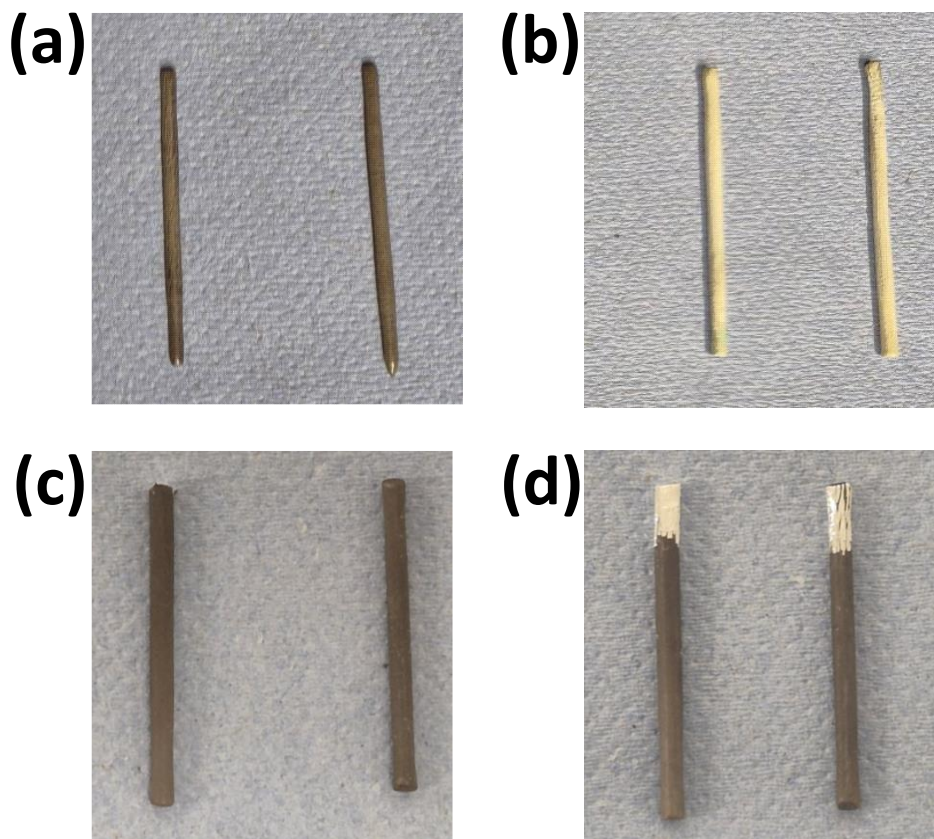

**Supplementary Figure 5.** Optical images of Ag/AgCl electrodes. (a) Pristine electrode pair prior to any electrochemical testing. (b) A separate electrode pair after 250 I-V cycles using a PVDF membrane, showing visible colour changes on electrode surface. (c-d) A third electrode pair used for nanochannel I-V measurements: (c) before and (d) after measurements with a bilayer nanochannel device comprising graphene as a spacer and hBN as top and bottom layers. In contrast to (b), no visible surface changes are observed in (d). All measurements were performed in 1 M KCl solution within an applied potential window of 1 V.



## Supporting Materials

### 6. SEM and EDX images of Ag/AgCl electrode after 250 I-V cycles with nanochannel:

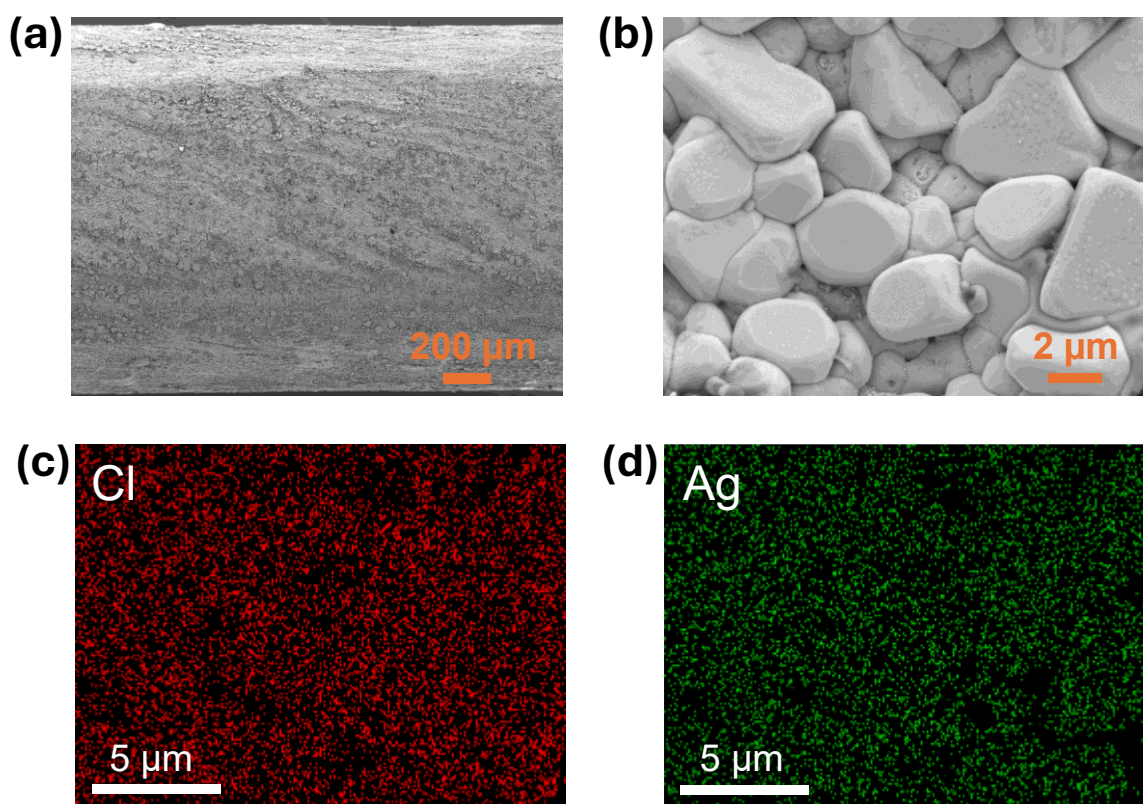

**Supplementary Figure 6.** SEM and EDX images of electrode after cycling. (a-b) SEM images of electrode surface acquired at an accelerated voltage of 5KV after 250 I-V cycles with nanochannel. (c-d) EDX elemental mapping in corresponding to obtained SEM image in (b). The IV measurements were performed in 1M KCl within an applied potential window of 1V using a nanochannel device comprising a 2 layer thick graphene spacer stacked between the top and bottom hBN flakes.
